# Supplementary material for: High adherence to all-oral directly acting antiviral HCV therapy among an inner-city patient population in a phase 2a study
Source: Springer Nature journal article supplement (doi:10.1007/s12072-015-9680-7), 2015-11-26
Supplement: MOESM1 [file 9159628]

## SUPPLEMENTARY APPENDIX

**Supplement to: Tess Petersen, Kerry Townsend, et al. High Adherence to All Oral Directly Acting Antiviral HCV Therapy Among Inner City Patient Population in Phase 2A Study**

### Contents

|                                                                                                                                                                                                                                   |                |
|-----------------------------------------------------------------------------------------------------------------------------------------------------------------------------------------------------------------------------------|----------------|
| <b>Supplemental Table 1: Seven Points Covered At Initiation of Directly Acting Antiviral Therapy for Hepatitis C</b>                                                                                                              | <b>page 2</b>  |
| <b>Supplemental Text 1: Questionnaire used at baseline (modified form AACTG Questionnaire)</b>                                                                                                                                    | <b>page 3</b>  |
| <b>Supplemental Text 2: Questionnaire used in follow up for 12 weeks of Ledipasvir/Sofosbuvir at Day 7, week 4, week 8, and week 12 (modified form AACTG Questionnaire)</b><br><i>Referred to as “Arm A” on the Questionnaire</i> | <b>page 9</b>  |
| <b>Supplemental Text 3: Questionnaire used in follow up for 6 weeks of Ledipasvir/Sofosbuvir + GS-9451 at week 6 (modified form AACTG Questionnaire)</b><br><i>Referred to as “Arm C” on the Questionnaire</i>                    | <b>page 11</b> |
| <b>Supplemental Text 4: Questionnaire used in follow up for 6 weeks of Ledipasvir/Sofosbuvir + GS-9669 at week 6 (modified form AACTG Questionnaire)</b><br><i>Referred to as “Arm B” on the Questionnaire</i>                    | <b>page 13</b> |

**Supplemental Table 1: Seven Points Covered At Initiation of Directly Acting  
Antiviral Therapy for Hepatitis C**

|                                                                                                                                                                                             |
|---------------------------------------------------------------------------------------------------------------------------------------------------------------------------------------------|
| - Adherence measures were in order to correlate study outcomes with adherence after completion of study, and as such, would not affect participation/continuation in the study at any point |
| - Instruction regarding proper use of MEMS cap: Patients are to only open MEMS cap when ready to take dose and close MEMS cap following dose                                                |
| - Patients instructed not to use a pill box for study drug                                                                                                                                  |
| - Patient is to take her/his dose at exactly the same time each day                                                                                                                         |
| - Appropriate dosing of study drug reviewed with patients (1 tablet PO once daily (arm A), 2 tablets PO once daily (arm C), or 3 tablets PO once daily (arm B) with or without food         |
| - Patients advised that it is OK to take dose (if forgotten), when she/he remembers within same day. Patients advised to not to double any doses (if dose forgotten until the next day)     |
| - Patients reminded to bring Rx bottle to every visit                                                                                                                                       |

# Adherence Baseline Questionnaire

---

Date: \_\_\_\_\_

Self   Interviewer   Both

Patient ID: \_\_\_\_\_

How Administered?

Study Visit: \_\_\_\_\_

---

The answers you give on this form will be used to plan ways to help other people who must take pills on a difficult schedule. Please do the best you can to answer all the questions. If you do not wish to answer a question, please draw a line through it. If you do not know how to answer a question, ask your study nurse to help. Thank you for helping in this important study.

**INSTRUCTIONS:** Please answer the following questions by placing a circle around the appropriate number response.

**A. How sure are you that:**

Please circle one response for each question.

|                                                                              | <u>Not at<br/>All Sure</u> | <u>Somewhat<br/>Sure</u> | <u>Very<br/>Sure</u> | <u>Extremely<br/>Sure</u> |
|------------------------------------------------------------------------------|----------------------------|--------------------------|----------------------|---------------------------|
| 1. You will be able to take all or most of the study medication as directed? | 0                          | 1                        | 2                    | 3                         |
| 2. The medication will have a positive effect on your health?                | 0                          | 1                        | 2                    | 3                         |

**B. The following questions ask about your social support.**

Please circle one response for each question.

|                                                                                                             | <u>Very<br/>Dissatisfied</u> | <u>Somewhat<br/>Dissatisfied</u> | <u>Somewhat<br/>Satisfied</u> | <u>Very<br/>Satisfied</u> |                       |
|-------------------------------------------------------------------------------------------------------------|------------------------------|----------------------------------|-------------------------------|---------------------------|-----------------------|
| 1. In general, how satisfied are you with the overall support you get from your friends and family members? | 0                            | 1                                | 2                             | 3                         |                       |
|                                                                                                             | <u>Not At All</u>            | <u>A Little</u>                  | <u>Somewhat</u>               | <u>A Lot</u>              | <u>Not Applicable</u> |
| 2. To what extent do your friends or family members help you remember to take your medication?              | 0                            | 1                                | 2                             | 3                         | 4                     |

C. People may miss taking their medications for various reasons. Here is a list of possible reasons why you may have missed taking any medications within the **past month**.

If you have **NOT** taken **any** medications within the **past month**, please

check this box and skip to Section **E**.

**In the past month, how often have you missed taking your medications because you:**

Please circle one response for each question.

|                                                                                       | <u>Never</u> | <u>Rarely</u> | <u>Sometimes</u> | <u>Often</u> |
|---------------------------------------------------------------------------------------|--------------|---------------|------------------|--------------|
| 1. Were away from home?                                                               | 0            | 1             | 2                | 3            |
| 2. Felt hassled or inconvenienced by medicine?                                        | 0            | 1             | 2                | 3            |
| 3. Simply forgot?                                                                     | 0            | 1             | 2                | 3            |
| 4. Had too many pills to take?                                                        | 0            | 1             | 2                | 3            |
| <hr/>                                                                                 |              |               |                  |              |
| 5. Felt worse when you took pills?                                                    | 0            | 1             | 2                | 3            |
| 6. Did not want others to notice you taking medication?                               | 0            | 1             | 2                | 3            |
| 7. Had a change in daily routine?                                                     | 0            | 1             | 2                | 3            |
| 8. Felt like the drug was toxic/harmful?                                              | 0            | 1             | 2                | 3            |
| <hr/>                                                                                 |              |               |                  |              |
| 9. Fell asleep/slept through dose time?                                               | 0            | 1             | 2                | 3            |
| 10. Felt sick or ill?                                                                 | 0            | 1             | 2                | 3            |
| 11. Felt depressed/overwhelmed?                                                       | 0            | 1             | 2                | 3            |
| 12. Had problem taking pills at specified times (with meals, on empty stomach, etc.)? | 0            | 1             | 2                | 3            |
| 13. Ran out of pills?                                                                 | 0            | 1             | 2                | 3            |
| 14. Felt like treatment was working?                                                  | 0            | 1             | 2                | 3            |

**D. When was the last time you missed taking any of your medications?** Check one box.

- Within the past **week**
- 1-2 **weeks** ago
- 2-4 **weeks** ago
- 1-3 **months** ago
- More than 3 **months** ago
- Never** skip medications or **not applicable**

**E. In the past week how often did you:**

Please circle one response for each question.

|                                                                                           | <u>Never/<br/>Rarely</u> | <u>Sometimes</u> | <u>Often</u> | <u>Mostly or<br/>Always</u> |
|-------------------------------------------------------------------------------------------|--------------------------|------------------|--------------|-----------------------------|
| 1. Feel like you couldn't shake off the blues even with help from your family or friends? | 0                        | 1                | 2            | 3                           |
| 2. Have trouble keeping your mind on what you were doing?                                 | 0                        | 1                | 2            | 3                           |
| 3. Feel that everything you did was an effort?                                            | 0                        | 1                | 2            | 3                           |
| 4. Have trouble sleeping?                                                                 | 0                        | 1                | 2            | 3                           |
| 5. Feel lonely?                                                                           | 0                        | 1                | 2            | 3                           |
| 6. Feel sad?                                                                              | 0                        | 1                | 2            | 3                           |
| 7. Feel like you just couldn't "get going"?                                               | 0                        | 1                | 2            | 3                           |

**F. In the past month, how often have you:**

Please circle one response for each question.

|                                                                                    | <u>Never</u> | <u>Almost<br/>Never</u> | <u>Sometimes</u> | <u>Fairly<br/>Often</u> | <u>Very<br/>Often</u> |
|------------------------------------------------------------------------------------|--------------|-------------------------|------------------|-------------------------|-----------------------|
| 1. Been upset because of something that happened unexpectedly?                     | 0            | 1                       | 2                | 3                       | 4                     |
| 2. Felt unable to control the important things in your life?                       | 0            | 1                       | 2                | 3                       | 4                     |
| 3. Felt nervous and "stressed"?                                                    | 0            | 1                       | 2                | 3                       | 4                     |
| 4. Felt confident in your ability to handle your personal problems?                | 0            | 1                       | 2                | 3                       | 4                     |
| 5. Felt that things were going your way?                                           | 0            | 1                       | 2                | 3                       | 4                     |
| 6. Found that you could not cope with all the things that you had to do?           | 0            | 1                       | 2                | 3                       | 4                     |
| 7. Been able to control irritations in your life?                                  | 0            | 1                       | 2                | 3                       | 4                     |
| 8. Felt that you were on top of things?                                            | 0            | 1                       | 2                | 3                       | 4                     |
| 9. Been angered because of things that happened that were outside of your control? | 0            | 1                       | 2                | 3                       | 4                     |
| 10. Felt problems were piling up so high that you could not overcome them?         | 0            | 1                       | 2                | 3                       | 4                     |



4. Please check "Yes" or "No" for each question.

a.  Yes  No

**Have you ever used marijuana?  
If you used this drug, have you used it within the past 6 months?**

Yes  No

b.  Yes  No

**Have you ever used cocaine (powder, crack, or freebase)?  
If you used this drug, have you used it within the past 6 months?**

Yes  No

c.  Yes  No

**Have you ever used heroin?  
If you used this drug, have you used it within the past 6 months?**

Yes  No

d.  Yes  No

**Have you ever used amphetamines (speed)?  
If you used this drug, have you used it within the past 6 months?**

Yes  No

H. These last questions ask about your background.

1. **What is the highest level of education you have completed?** (check one)

- 11th grade or less
- High school graduate or GED
- 2 years of college / AA degree / Technical school training
- College graduate (BA or BS)
- Master's Degree
- Doctorate / medical degree / law degree

2. **What is (are) the most likely way(s) that you became infected with hepatitis C?** (check "Yes" or "No" for each question.)

a. Shared needles with a person who was Hepatitis C+

- Yes       No

b. Shared straws (snorting) with a person who was Hepatitis C+

- Yes       No

c. Blood transfusion or other medical procedure

- Yes       No

d. Sex with a person who was Hepatitis C+

- Yes       No

e. Don't know

- Yes       No

f. Other (needle stick at work, etc.)

- Yes       No

Please specify: \_\_\_\_\_

3. **Do you work for pay outside the home?**       Yes       No

4. **Do you have any children?**       Yes       No

If Yes, how many live with you? \_\_\_\_\_





**4. People may miss taking their medications for various reasons. Here is a list of possible reasons why you may miss taking your medications. How often have you missed taking your medications because you:** (Circle one response for each question.)

|                                                                                        | <b>Never</b> | <b>Rarely</b> | <b>Sometimes</b> | <b>Often</b> |
|----------------------------------------------------------------------------------------|--------------|---------------|------------------|--------------|
| 1. Were away from home?                                                                | 0            | 1             | 2                | 3            |
| 2. Felt hassled or inconvenienced by medicine?                                         | 0            | 1             | 2                | 3            |
| 3. Simply forgot?                                                                      | 0            | 1             | 2                | 3            |
| 4. Had too many pills to take?                                                         | 0            | 1             | 2                | 3            |
| 5. Felt worse when you took pills?                                                     | 0            | 1             | 2                | 3            |
| 6. Did not want others to notice you taking medication?                                | 0            | 1             | 2                | 3            |
| 7. Had a change in daily routine?                                                      | 0            | 1             | 2                | 3            |
| 8. Felt like the drug was toxic/harmful?                                               | 0            | 1             | 2                | 3            |
| 9. Fell asleep/slept through dose time?                                                | 0            | 1             | 2                | 3            |
| 10. Felt sick or ill?                                                                  | 0            | 1             | 2                | 3            |
| 11. Felt depressed/overwhelmed?                                                        | 0            | 1             | 2                | 3            |
| 12. Had problems taking pills at specified times (with meals, on empty stomach, etc.)? | 0            | 1             | 2                | 3            |
| 13. Ran out of pills?                                                                  | 0            | 1             | 2                | 3            |
| 14. Felt like treatment was working?                                                   | 0            | 1             | 2                | 3            |

**SYNERGY ADHERENCE QUESTIONNAIRE: GROUP C**

Date \_\_\_\_\_

Study ID \_\_\_\_\_

Study Visit \_\_\_\_\_

**1. How many doses of GS-7977/GS-5885 (blue pill) have you missed since your last study visit? \_\_\_\_\_**

**2. How many doses of GS-9451 have you missed since your last study visit? \_\_\_\_\_**

**3. Since your last study visit, how often did you take your study medications with food? Check one.**

- All of the time
- Most of the time
- About half of the time
- Some of the time
- Never

**4. Some people find that they forget to take their pills on the weekend days. Did you miss any of your hepatitis C medications last weekend– last Saturday or Sunday?**

- Yes
- No

**5. When was the last time you missed any of your study medications? Check one.**

- Within the past week
- 1-2 weeks ago
- 2-4 weeks ago
- 1-3 months ago
- Never skip medications or not applicable

**6. People may miss taking their medications for various reasons. Here is a list of possible reasons why you may miss taking your medications. Have you ever missed taking your study medications because you: (Circle one response for each question.)**

|                                                | <b>Never</b> | <b>Rarely</b> | <b>Sometimes</b> | <b>Often</b> |
|------------------------------------------------|--------------|---------------|------------------|--------------|
| 1. Were away from home?                        | 0            | 1             | 2                | 3            |
| 2. Felt hassled or inconvenienced by medicine? | 0            | 1             | 2                | 3            |
| 3. Simply forgot?                              | 0            | 1             | 2                | 3            |
| 4. Had too many pills to take?                 | 0            | 1             | 2                | 3            |
| 5. Felt worse when you took pills?             | 0            | 1             | 2                | 3            |

## SYNERGY ADHERENCE QUESTIONNAIRE: GROUP C

|     |                                                                                    |   |   |   |   |
|-----|------------------------------------------------------------------------------------|---|---|---|---|
| 6.  | Did not want others to notice you taking medication?                               | 0 | 1 | 2 | 3 |
| 7.  | Had a change in daily routine?                                                     | 0 | 1 | 2 | 3 |
| 8.  | Felt like the drug was toxic/harmful?                                              | 0 | 1 | 2 | 3 |
| 9.  | Fell asleep/slept through dose time?                                               | 0 | 1 | 2 | 3 |
| 10. | Felt sick or ill?                                                                  | 0 | 1 | 2 | 3 |
| 11. | Felt depressed/overwhelmed?                                                        | 0 | 1 | 2 | 3 |
| 12. | Had problems taking pills at specified times (with meals, on empty stomach, etc.)? | 0 | 1 | 2 | 3 |
| 13. | Ran out of pills?                                                                  | 0 | 1 | 2 | 3 |
| 14. | Felt like treatment was working?                                                   | 0 | 1 | 2 | 3 |

**SYNERGY ADHERENCE QUESTIONNAIRE: GROUP B**

Date \_\_\_\_\_

Study ID \_\_\_\_\_

Study Visit \_\_\_\_\_

**1. How many doses of GS-7977/GS-5885 (blue pill) have you missed since your last study visit? \_\_\_\_\_**

**2. How many doses of GS-9669 (white pills) have you missed since your last study visit? \_\_\_\_\_**

**3. Since your last study visit, how often did you take your study medications with food? Check one.**

- All of the time
- Most of the time
- About half of the time
- Some of the time
- Never

**4. Some people find that they forget to take their pills on the weekend days. Did you miss any of your hepatitis C medications last weekend– last Saturday or Sunday?**

- Yes
- No

**5. When was the last time you missed any of your study medications? Check one.**

- Within the past week
- 1-2 weeks ago
- 2-4 weeks ago
- 1-3 months ago
- Never skip medications or not applicable

**6. People may miss taking their medications for various reasons. Here is a list of possible reasons why you may miss taking your medications. Have you ever missed taking your study medications because you: (Circle one response for each question.)**

|                                                | <b>Never</b> | <b>Rarely</b> | <b>Sometimes</b> | <b>Often</b> |
|------------------------------------------------|--------------|---------------|------------------|--------------|
| 1. Were away from home?                        | 0            | 1             | 2                | 3            |
| 2. Felt hassled or inconvenienced by medicine? | 0            | 1             | 2                | 3            |
| 3. Simply forgot?                              | 0            | 1             | 2                | 3            |
| 4. Had too many pills to take?                 | 0            | 1             | 2                | 3            |
| 5. Felt worse when you took pills?             | 0            | 1             | 2                | 3            |

## SYNERGY ADHERENCE QUESTIONNAIRE: GROUP B

|     |                                                                                    |   |   |   |   |
|-----|------------------------------------------------------------------------------------|---|---|---|---|
| 6.  | Did not want others to notice you taking medication?                               | 0 | 1 | 2 | 3 |
| 7.  | Had a change in daily routine?                                                     | 0 | 1 | 2 | 3 |
| 8.  | Felt like the drug was toxic/harmful?                                              | 0 | 1 | 2 | 3 |
| 9.  | Fell asleep/slept through dose time?                                               | 0 | 1 | 2 | 3 |
| 10. | Felt sick or ill?                                                                  | 0 | 1 | 2 | 3 |
| 11. | Felt depressed/overwhelmed?                                                        | 0 | 1 | 2 | 3 |
| 12. | Had problems taking pills at specified times (with meals, on empty stomach, etc.)? | 0 | 1 | 2 | 3 |
| 13. | Ran out of pills?                                                                  | 0 | 1 | 2 | 3 |
| 14. | Felt like treatment was working?                                                   | 0 | 1 | 2 | 3 |
